# Supplementary material for: Stabilizing cathode structure via the binder material with high resilience for lithium–sulfur batteries
Source: Royal Society of Chemistry journal article supplement (doi:10.1039/c9ra08238g), 2019-01-01
Supplement: c9ra08238g1.pdf [file c9ra08238g1.pdf]

## Supplementary Information

### Stabilizing Cathode Structure *via* the Binder Material with High Resilience for Lithium-Sulfur Batteries

*Fengquan Liu<sup>†</sup>, Zhiyu Hu<sup>†</sup>, Jinxin Xue, Hong Huo, Jianjun Zhou<sup>\*</sup>, Lin Li*

Beijing Key Laboratory of Energy Conversion and Storage Materials, College of  
Chemistry, Beijing Normal University, Beijing, China 100875

<sup>†</sup>Fengquan Liu and Zhiyu Hu contribute equally for this study.

Correspondence and requests for materials should be addressed to J. J. Zhou.

([pla\\_zjj@bnu.edu.cn](mailto:pla_zjj@bnu.edu.cn))

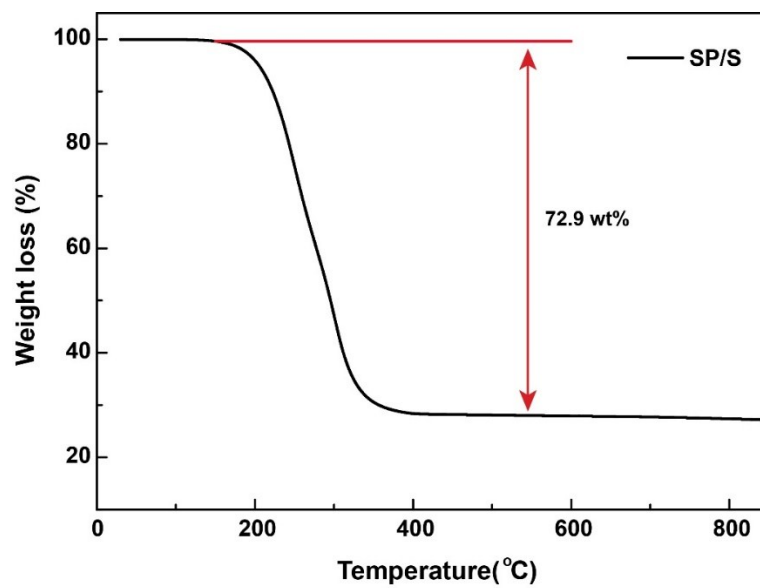

**Fig. S1.** The TGA curve of the SP/S composite cathode.

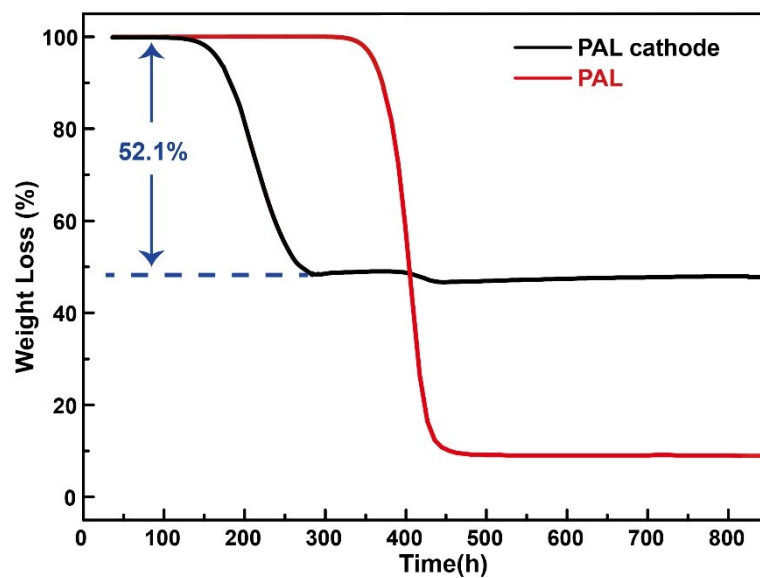

**Fig. S2.** The thermogravimetric curves of the PAL and PAL cathode after vacuum drying.

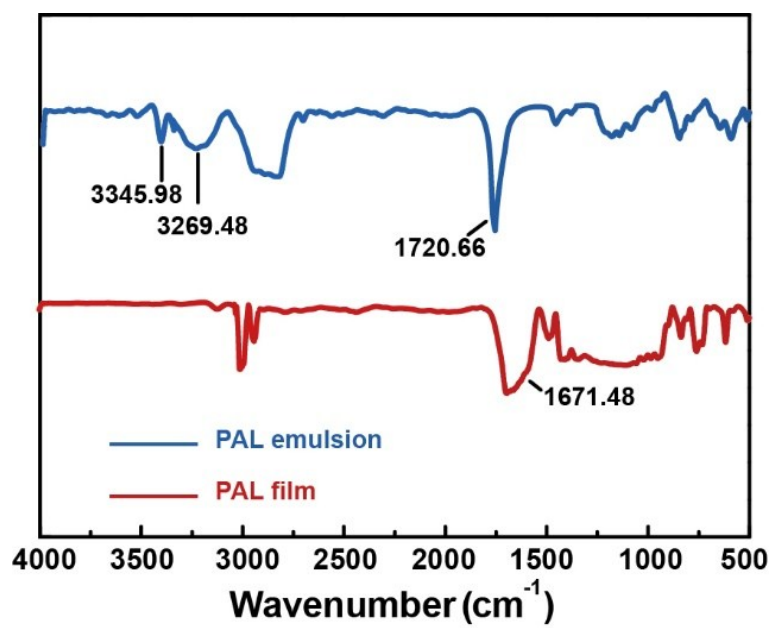

**Fig. S3.** The FTIR spectra of the PAL emulsion and PAL film.

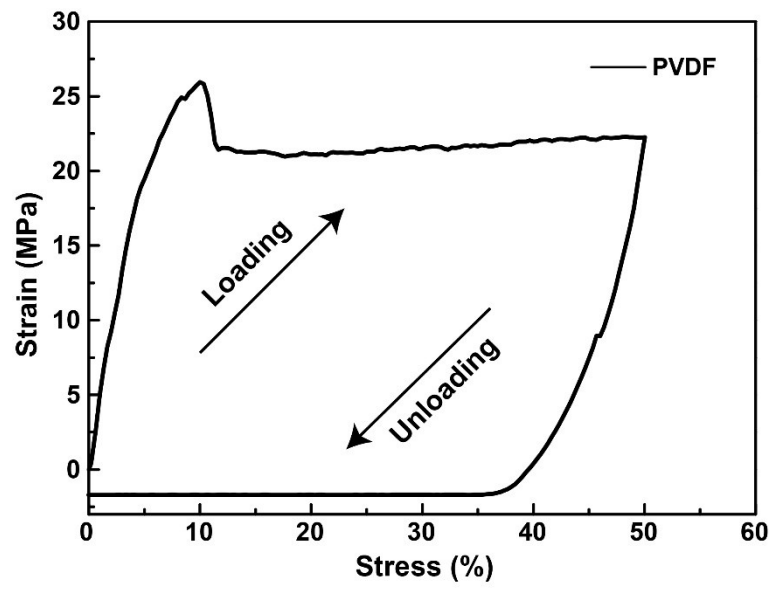

**Fig. S4.** Cyclic loading-unloading curves of PVDF film when the maximum tensile strain is 50%.

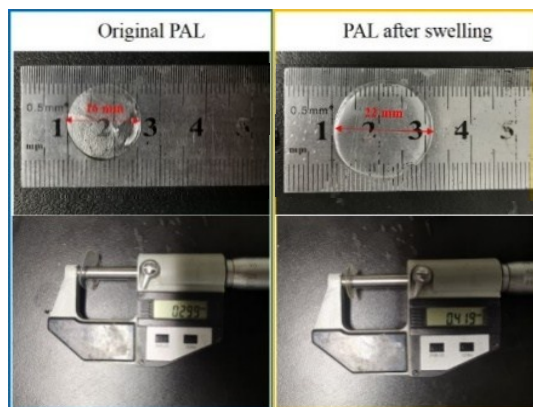

**Fig. S5.** Images of the PAL disk before and after swelling.

As shown in Fig. S5†, a disk of PAL membrane was prepared and immersed in the liquid electrolyte (1 M LiTFSI DOL/DME (v/v, 1/1) with 1 wt% LiNO<sub>3</sub>). After 24 hours, the diameter of the disk increased from 16 mm to 22 mm, and the thickness increased from 0.299 mm to 0.419 mm, corresponding to about 40% increase in both the diameter and thickness.

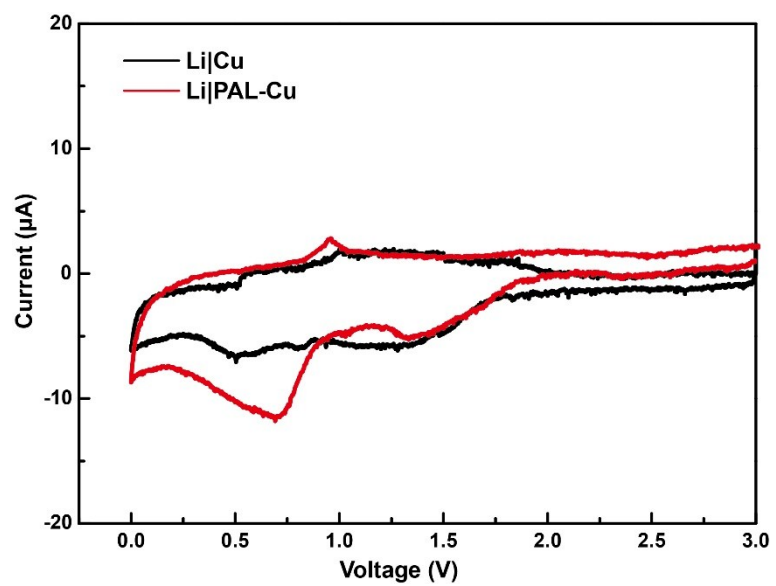

**Fig. S6.** The CV profiles of Li|Cu and Li|PAL-Cu batteries with a scan rate of 0.1 mV/s .

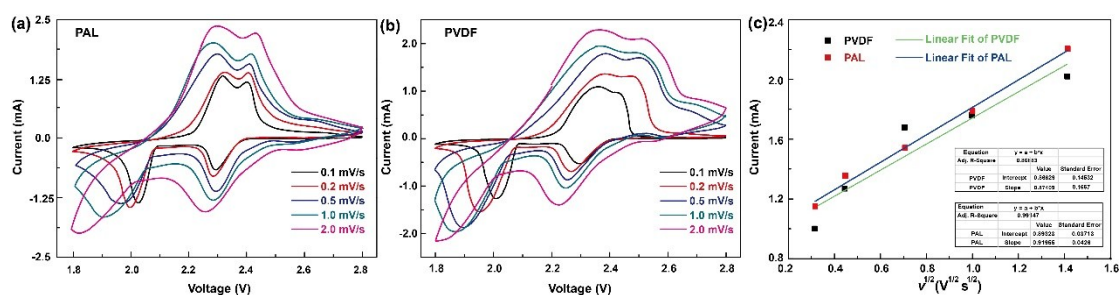

**Fig. S7.** The CV profiles of (a) the PAL and (b) PVDF battery at the varied scanning rates from 0.1 mV s<sup>-1</sup> to 2.0 mV s<sup>-1</sup>. (c) Linear fits of PAL and PVDF batteries between peak current and the square root of the scanning rate.

CV is scanned at variable rate to study the positive effect of the PAL binder (Figs. S7(a-b), ESI<sup>†</sup>). The apparent chemical diffusion coefficient of Li ion ( $D_{Li^+}$ ) can be calculated by the Randles-Sevcik equation.

$$I_p = 2.69 \times 10^5 n^{3/2} C_{Li^+} A D_{Li^+}^{1/2} v^{1/2}$$

Where  $I_p$  is the peak current,  $n$  is the charge transfer number (for Li-S battery,  $n=2$ ),  $A$  is the surface area of electrode,  $C_{Li^+}$  is Li ion concentration in unit volume,  $v$  is the scan rate ( $V s^{-1}$ ). The peak current can be linearly fitted with the square root of the scanning rate (Fig. S7(c), ESI<sup>†</sup>). The slope of fitting linear is 0.950 and 0.864 for the PAL and PVDF cathodes, respectively. Because other parameters such as  $n$ ,  $C_{Li^+}$  and  $A$  can be regarded as constants,  $D_{Li^+}$  is proportional to the slope, which means that the slope can be used as a measure of the  $D_{Li^+}$ . For PAL and PVDF cathodes, the  $D_{Li^+}$  ratio is 1.10, indicating larger diffusion coefficient and faster Li<sup>+</sup> transport in PAL cathode, verifying the role of stable cathode structure in promoting the diffusion and transfer of Li<sup>+</sup>.



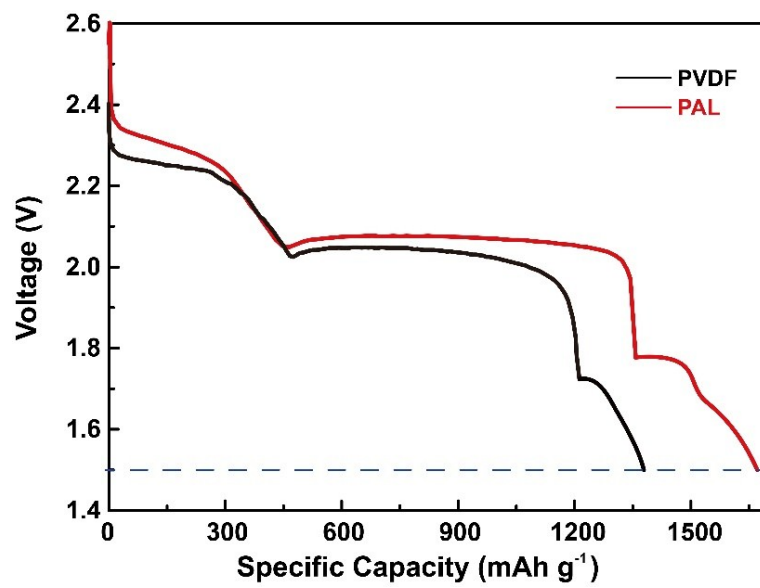

**Fig. S8.** The discharge profiles of different sulfur cathodes discharge to 1.5 V.

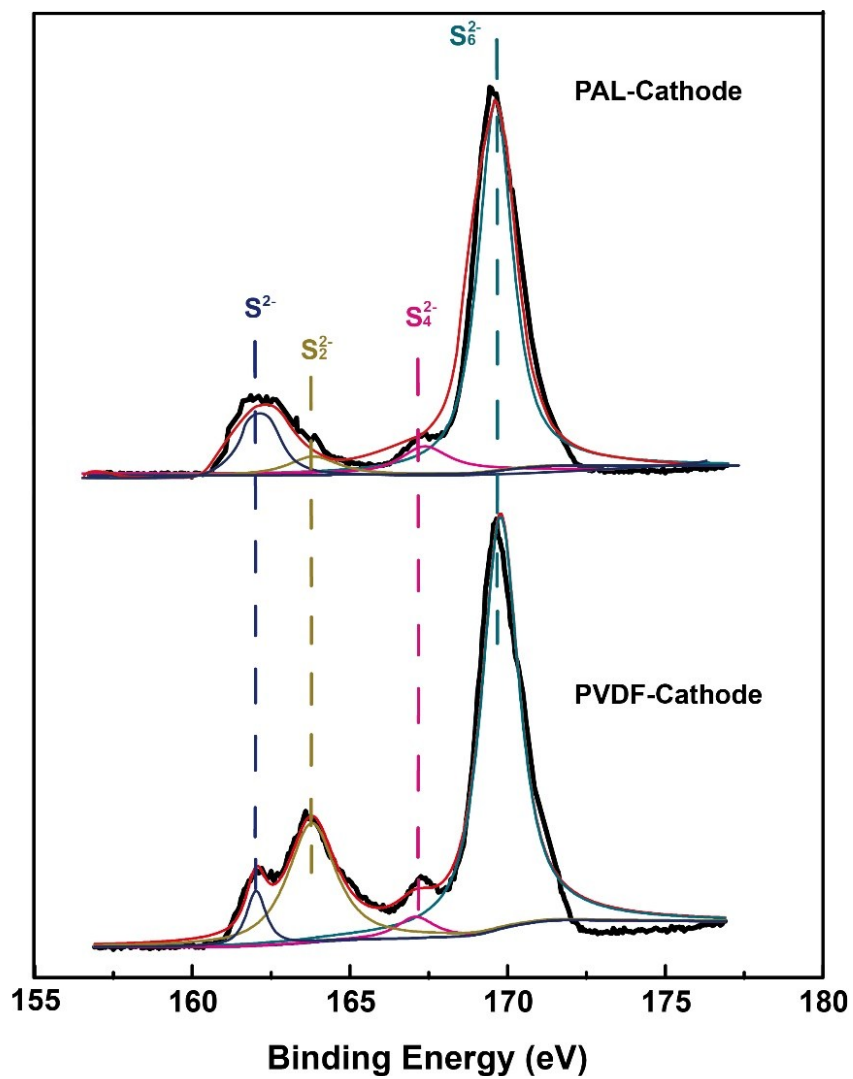

**Fig. S9.** The XPS spectra of S<sub>2p</sub> for different sulfur cathodes discharge to 1.5 V.

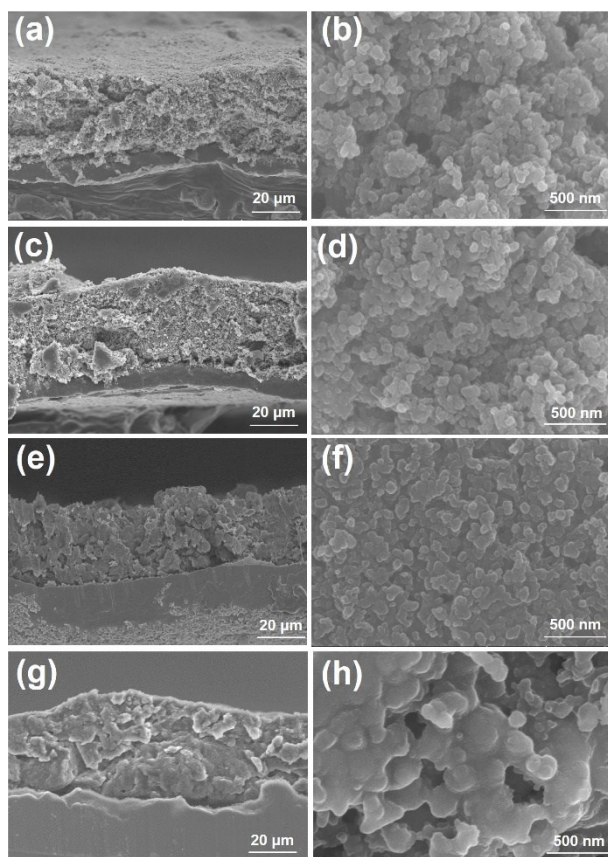

**Fig. S10.** The cross-sectional morphologies of (a,b) PAL and (c,d) PVDF cathodes after the 1<sup>st</sup> cycle. The cross-sectional morphologies of (e,f) PAL and (g,h) PVDF cathodes after the 100<sup>th</sup> cycle.

**Table S1** The electrochemical performance of Li-S batteries with different binders.

| Type of binder | Discharge capacity                                                                                           | Capacity retention ratio                          | Ref. |
|----------------|--------------------------------------------------------------------------------------------------------------|---------------------------------------------------|------|
| PPA            | ~763 mAh g <sup>-1</sup> , 100 cycles<br>at 0.2 C.                                                           | 93%                                               | 40   |
| PEG-PEO        | ~650 mAh g <sup>-1</sup> , 50 cycles<br>at 0.2 C.                                                            | 54.2%                                             | 41   |
| PVP            | ~714 mAh g <sup>-1</sup> , 200 cycles<br>at 0.2 C.                                                           | 94%                                               | 42   |
| Na-alginate    | 508 mAh g <sup>-1</sup> , 50 cycles<br>at 0.2 C.                                                             | 64.5%                                             | 43   |
| Gelatin        | 626 mAh g <sup>-1</sup> (for FD-cathode) and 408 mAh g <sup>-1</sup> (for ETD-cathode), 50 cycles at 0.12 C. | 50.7% (for FD-cathode)<br>36.0% (for ETD-cathode) | 44   |
| PEI            | 554 mAh g <sup>-1</sup> , 300 cycles<br>at 0.5 C.                                                            | 82.7%                                             | 45   |
| PAA            | 735 mAh g <sup>-1</sup> , 100 cycles<br>at 0.5 C.                                                            | 49%                                               | 46   |
| GO-PAA         | 635 mAh g <sup>-1</sup> , 100 cycles<br>at 0.5 C.                                                            | 77.4%                                             | 47   |

|        |                                                                     |       |               |
|--------|---------------------------------------------------------------------|-------|---------------|
| TA/PEO | 476.7 mAh g <sup>-1</sup> , 1000 cycles<br>at 0.2 C                 | 67%   | 48            |
| APP    | 640 mAh g <sup>-1</sup> , 400 cycles<br>at 0.5 C                    | 87%   | 49            |
| PTMA   | 625 mAh g <sup>-1</sup> , 500 cycles<br>at 100 mA g <sup>-1</sup> . | 75%   | 50            |
| PAL    | 802 mAh g <sup>-1</sup> , 100 cycles<br>at 0.1 C.                   | 62.1% | This<br>paper |

---
